# Supplementary material for: Core electron binding energies of adsorbates on Cu(111) from first-principles calculations
Source: Royal Society of Chemistry journal article supplement (doi:10.1039/c8cp04955f), 2018-01-01
Supplement: c8cp04955f2.pdf [file c8cp04955f2.pdf]

The geometries of the clusters with the adsorbates used for calculating the core electron binding energies are given on the following pages in .xyz file format. The file names given are not part of the files themselves; the first line denotes the number of atoms in the “molecule” (= cluster + adsorbate in this context), the second line is an arbitrary comment, and the following lines contain the element symbol followed by the x, y, and z coordinates in Angstroms.

## CO\_on\_Cu\_pos1.xyz

91

Atoms

|    |              |              |              |
|----|--------------|--------------|--------------|
| Cu | -2.544967634 | -4.420202696 | -2.092520700 |
| Cu | -3.818387734 | -5.154734196 | -0.033176709 |
| Cu | -0.000042434 | -4.419561296 | -2.093244300 |
| Cu | -1.272494134 | -5.155437896 | -0.036419736 |
| Cu | -5.088939569 | -0.011387077 | -2.094876800 |
| Cu | -5.088893369 | -2.953558200 | -0.035997863 |
| Cu | -6.358789069 | -0.748967430 | -0.037288865 |
| Cu | -5.088837069 | 1.455487500  | -0.037299869 |
| Cu | 2.544801134  | -4.420366896 | -2.093164500 |
| Cu | 1.272420934  | -5.155656296 | -0.036564380 |
| Cu | 5.088659585  | -4.419456296 | -2.093393600 |
| Cu | 3.818167434  | -5.154875196 | -0.033608018 |
| Cu | -0.000056198 | -2.924066000 | -6.186217600 |
| Cu | -2.544251500 | 1.482645300  | -6.186926300 |
| Cu | -2.545184800 | -1.456645300 | -4.130715600 |
| Cu | -1.272121600 | -0.720978490 | -6.185779300 |
| Cu | -1.272432400 | -3.659078100 | -4.130829800 |
| Cu | -3.815270500 | 0.746499940  | -4.132001800 |
| Cu | -3.815696000 | -2.216670800 | -2.090890700 |
| Cu | 2.544052000  | 1.482795300  | -6.186295400 |
| Cu | 2.545048300  | -1.456413400 | -4.130225000 |
| Cu | 3.815922600  | -0.720994140 | -6.186433500 |
| Cu | 1.272052500  | -0.720814190 | -6.185350400 |
| Cu | 2.544259300  | -2.924167700 | -6.186847800 |
| Cu | 3.816307800  | -3.660069500 | -4.131191000 |
| Cu | 1.272270600  | -3.659034300 | -4.130555300 |
| Cu | -0.000123835 | 2.950693500  | -4.131303200 |
| Cu | 1.271641300  | 3.686905800  | -6.186074300 |
| Cu | -1.271813200 | 3.686710000  | -6.186456100 |
| Cu | -0.000005185 | 1.483522100  | -6.186608300 |
| Cu | 0.000018490  | -0.011637597 | -2.089379200 |
| Cu | 1.271141900  | 0.746897940  | -4.128909900 |
| Cu | -1.271522900 | 0.746741140  | -4.129273600 |
| Cu | -0.000128405 | -1.455984700 | -4.129009300 |
| Cu | 0.000237678  | -2.953147600 | -0.035996314 |
| Cu | 1.272203600  | -2.215956900 | -2.091063400 |
| Cu | -1.272382000 | -2.216250900 | -2.091161300 |
| Cu | -2.543967600 | 4.393639100  | -2.093164500 |
| Cu | -2.544665700 | 2.950358000  | -4.132583100 |
| Cu | -2.543471400 | 1.458133800  | -0.036558444 |
| Cu | -1.272448100 | 2.192089100  | -2.092975600 |
| Cu | -3.816294900 | 2.191110700  | -2.093538200 |
| Cu | -2.545739500 | -0.012827658 | -2.090107000 |
| Cu | -1.272924600 | -0.748787210 | -0.038399287 |
| Cu | -3.819359100 | -0.749144870 | -0.038018136 |
| Cu | -2.543892800 | -2.954890300 | -0.035544046 |
| Cu | -3.816347800 | 3.658349700  | -0.036564380 |

|    |              |              |              |
|----|--------------|--------------|--------------|
| Cu | 5.088666000  | 2.950065500  | -4.131733900 |
| Cu | 3.816695700  | 3.686431900  | -6.187846300 |
| Cu | 5.088639800  | 1.482938000  | -6.187687900 |
| Cu | 5.088597900  | -0.011387077 | -2.094876800 |
| Cu | 3.815326000  | 0.746812640  | -4.131865900 |
| Cu | 5.088706300  | -1.457467500 | -4.129957200 |
| Cu | 5.088644100  | -2.953558200 | -0.035997863 |
| Cu | 3.815551500  | -2.216576400 | -2.090505500 |
| Cu | 2.543801100  | 4.393803300  | -2.092520700 |
| Cu | 2.544575000  | 2.950607600  | -4.132159500 |
| Cu | 2.543089400  | 1.457860600  | -0.035718549 |
| Cu | 3.816124000  | 2.191095000  | -2.092995300 |
| Cu | 1.272314000  | 2.192301900  | -2.092778600 |
| Cu | 2.545605200  | -0.012556271 | -2.089983400 |
| Cu | 3.818748400  | -0.748967430 | -0.037288865 |
| Cu | 1.273166100  | -0.748680460 | -0.036928042 |
| Cu | 2.543484900  | -2.954147800 | -0.034778924 |
| Cu | -0.000109149 | 4.394549700  | -2.093393600 |
| Cu | 1.270381000  | 3.659271800  | -0.033176709 |
| Cu | -1.270601300 | 3.659130800  | -0.033608018 |
| Cu | 0.000181029  | 1.456430000  | -0.037166062 |
| Cu | 5.088726300  | 4.394444700  | -2.093244300 |
| Cu | 3.816274600  | 3.658568100  | -0.036419736 |
| Cu | 5.088700400  | 1.455487500  | -0.037299869 |
| C  | -0.003336171 | -0.725139150 | 3.079423600  |
| O  | 1.169404000  | -0.721925790 | 3.091052200  |
| O  | -1.176464800 | -0.728109490 | 3.076017100  |
| Cu | -1.272460934 | 5.153936496  | -4.131191000 |
| Cu | -0.000124634 | 5.860447796  | -0.035997863 |
| Cu | -1.273217234 | 6.597429596  | -2.090505500 |
| Cu | -2.545283834 | 5.859858196  | -0.034778924 |
| Cu | 6.362266969  | 0.746499940  | -4.132001800 |
| Cu | 6.361841469  | -2.216670800 | -2.090890700 |
| Cu | 7.634066069  | 1.458133800  | -0.036558444 |
| Cu | 6.361242569  | 2.191110700  | -2.093538200 |
| Cu | 7.631797969  | -0.012827658 | -2.090107000 |
| Cu | 6.358178369  | -0.749144870 | -0.038018136 |
| Cu | 6.361189669  | 3.658349700  | -0.036564380 |
| Cu | 3.816336334  | 5.154927896  | -4.130829800 |
| Cu | 1.272292734  | 5.153773396  | -4.131473600 |
| Cu | 1.273072734  | 6.597335196  | -2.090890700 |
| Cu | 5.089006412  | 5.860858396  | -0.035996314 |
| Cu | 3.816386734  | 6.597755096  | -2.091161300 |
| Cu | 2.544875934  | 5.859115696  | -0.035544046 |

## CO\_on\_Cu\_pos2.xyz

91

Atoms

|    |              |              |              |
|----|--------------|--------------|--------------|
| Cu | 1.274089266  | -3.660440496 | -4.131733900 |
| Cu | 0.002118966  | -2.924074096 | -6.187846300 |
| Cu | -1.270775634 | -2.216702696 | -2.092520700 |
| Cu | -1.270001734 | -3.659898396 | -4.132159500 |
| Cu | -1.271487334 | -5.152645396 | -0.035718549 |
| Cu | 0.001547266  | -4.419410996 | -2.092995300 |
| Cu | -2.542262734 | -4.418204096 | -2.092778600 |
| Cu | -3.814685834 | -2.215956296 | -2.093393600 |
| Cu | -2.544195734 | -2.951234196 | -0.033176709 |
| Cu | -5.085178034 | -2.951375196 | -0.033608018 |
| Cu | -3.814395734 | -5.154075996 | -0.037166062 |
| Cu | 1.274149566  | -2.216061296 | -2.093244300 |
| Cu | 0.001697866  | -2.951937896 | -0.036419736 |
| Cu | 1.274123666  | -5.155018496 | -0.037299869 |
| Cu | -3.814747569 | 2.192112900  | -2.094876800 |
| Cu | -3.814639169 | 0.746032500  | -4.129957200 |
| Cu | -3.814701369 | -0.750058200 | -0.035997863 |
| Cu | -5.087793969 | -0.013076400 | -2.090505500 |
| Cu | -5.084597069 | 1.454532600  | -0.037288865 |
| Cu | -6.359860569 | -0.750647800 | -0.034778924 |
| Cu | -3.814645069 | 3.658987500  | -0.037299869 |
| Cu | 2.546098534  | -2.924269296 | -6.188094600 |
| Cu | 3.818993134  | -2.216866896 | -2.093164500 |
| Cu | 3.818295034  | -3.660147996 | -4.132583100 |
| Cu | 3.819489334  | -5.152372196 | -0.036558444 |
| Cu | 5.090512634  | -4.418416896 | -2.092975600 |
| Cu | 2.546665834  | -4.419395296 | -2.093538200 |
| Cu | 2.546612934  | -2.952156296 | -0.036564380 |
| Cu | 6.362851634  | -2.215956296 | -2.093393600 |
| Cu | 5.092359434  | -2.951375196 | -0.033608018 |
| Cu | 1.274135800  | -0.720566000 | -6.186217600 |
| Cu | -1.270059500 | 3.686145300  | -6.186926300 |
| Cu | -1.270992800 | 0.746854700  | -4.130715600 |
| Cu | 0.002070400  | 1.482521500  | -6.185779300 |
| Cu | -2.542013500 | 1.482366000  | -6.186962700 |
| Cu | -1.270240600 | -0.721023700 | -6.187424600 |
| Cu | 0.001759600  | -1.455578100 | -4.130829800 |
| Cu | -2.542284000 | -1.456732600 | -4.131473600 |
| Cu | -2.541078500 | 2.949999900  | -4.132001800 |
| Cu | -2.541504000 | -0.013170800 | -2.090890700 |
| Cu | 3.818244000  | 3.686295300  | -6.186295400 |
| Cu | 3.819240300  | 0.747086600  | -4.130225000 |
| Cu | 5.090114600  | 1.482505900  | -6.186433500 |
| Cu | 2.546244500  | 1.482685800  | -6.185350400 |
| Cu | 3.818451300  | -0.720667700 | -6.186847800 |
| Cu | 5.090499800  | -1.456569500 | -4.131191000 |
| Cu | 2.546462600  | -1.455534300 | -4.130555300 |

|    |              |              |              |
|----|--------------|--------------|--------------|
| Cu | 1.274068200  | 5.154193500  | -4.131303200 |
| Cu | 1.274186800  | 3.687022100  | -6.186608300 |
| Cu | 1.274210500  | 2.191862400  | -2.089379200 |
| Cu | 2.545333900  | 2.950397900  | -4.128909900 |
| Cu | 0.002669100  | 2.950241100  | -4.129273600 |
| Cu | 1.274063600  | 0.747515300  | -4.129009300 |
| Cu | 1.274429700  | -0.749647600 | -0.035996314 |
| Cu | 2.546395600  | -0.012456900 | -2.091063400 |
| Cu | 0.001810000  | -0.012750900 | -2.091161300 |
| Cu | -1.269775600 | 6.597139100  | -2.093164500 |
| Cu | -1.270473700 | 5.153858000  | -4.132583100 |
| Cu | -1.269279400 | 3.661633800  | -0.036558444 |
| Cu | 0.001743900  | 4.395589100  | -2.092975600 |
| Cu | -2.542102900 | 4.394610700  | -2.093538200 |
| Cu | -1.271547500 | 2.190672300  | -2.090107000 |
| Cu | 0.001267400  | 1.454712800  | -0.038399287 |
| Cu | -2.545167100 | 1.454355100  | -0.038018136 |
| Cu | -1.269700800 | -0.751390300 | -0.035544046 |
| Cu | -2.542155800 | 5.861849700  | -0.036564380 |
| Cu | 6.362789900  | 2.192112900  | -2.094876800 |
| Cu | 5.089518000  | 2.950312600  | -4.131865900 |
| Cu | 6.362898300  | 0.746032500  | -4.129957200 |
| Cu | 6.362836100  | -0.750058200 | -0.035997863 |
| Cu | 5.089743500  | -0.013076400 | -2.090505500 |
| Cu | 3.817993100  | 6.597303300  | -2.092520700 |
| Cu | 3.818767000  | 5.154107600  | -4.132159500 |
| Cu | 3.817281400  | 3.661360600  | -0.035718549 |
| Cu | 5.090316000  | 4.394595000  | -2.092995300 |
| Cu | 2.546506000  | 4.395801900  | -2.092778600 |
| Cu | 3.819797200  | 2.190943700  | -2.089983400 |
| Cu | 5.092940400  | 1.454532600  | -0.037288865 |
| Cu | 2.547358100  | 1.454819500  | -0.036928042 |
| Cu | 3.817676900  | -0.750647800 | -0.034778924 |
| Cu | 1.274082900  | 6.598049700  | -2.093393600 |
| Cu | 2.544573000  | 5.862771800  | -0.033176709 |
| Cu | 0.003590700  | 5.862630800  | -0.033608018 |
| Cu | 1.274373000  | 3.659930000  | -0.037166062 |
| Cu | 5.090466600  | 5.862068100  | -0.036419736 |
| Cu | 6.362892400  | 3.658987500  | -0.037299869 |
| C  | 1.270855800  | 1.478360900  | 3.079423600  |
| O  | 2.443596000  | 1.481574200  | 3.091052200  |
| O  | 0.097727200  | 1.475390500  | 3.076017100  |
| Cu | 7.636033469  | -0.013170800 | -2.090890700 |
| Cu | 7.632370369  | 1.454355100  | -0.038018136 |

## CO\_on\_Cu\_pos1.xyz

90

Atoms

|    |              |              |              |
|----|--------------|--------------|--------------|
| Cu | -5.088768469 | 0.002217893  | -2.069854068 |
| Cu | -5.088768469 | -2.932066787 | 0.003917049  |
| Cu | -6.363951087 | -0.731657725 | 0.026342104  |
| Cu | -5.088768469 | 1.473581672  | 0.031416005  |
| Cu | -2.541446745 | -4.402000603 | -2.084258761 |
| Cu | -3.818760304 | -5.134180428 | 0.028151722  |
| Cu | 2.541446745  | -4.402000603 | -2.084258761 |
| Cu | 0.000000000  | -4.419335717 | -2.088898946 |
| Cu | 1.284521937  | -5.141387633 | 0.038112461  |
| Cu | -1.284521937 | -5.141387633 | 0.038112461  |
| Cu | 5.088769000  | -4.400042926 | -2.090528480 |
| Cu | 3.818760304  | -5.134180428 | 0.028151722  |
| Cu | 0.000000000  | -2.949130104 | -6.268580725 |
| Cu | -2.553811918 | 1.469005719  | -6.272164391 |
| Cu | -2.541238878 | -1.474222398 | -4.149060958 |
| Cu | -1.273819498 | -0.740698280 | -6.274401378 |
| Cu | -1.282964793 | -3.671075865 | -4.156269962 |
| Cu | -3.815071059 | 0.726852564  | -4.140865955 |
| Cu | -3.815266442 | -2.198802880 | -2.080382089 |
| Cu | 2.553811918  | 1.469005719  | -6.272164391 |
| Cu | 2.541238878  | -1.474222398 | -4.149060958 |
| Cu | 3.817366788  | -0.741558694 | -6.263756387 |
| Cu | 1.273819498  | -0.740698280 | -6.274401378 |
| Cu | 2.548683123  | -2.944070523 | -6.286853345 |
| Cu | 3.819783676  | -3.678613726 | -4.158888428 |
| Cu | 1.282964793  | -3.671075865 | -4.156269962 |
| Cu | 0.000000000  | 2.935438130  | -4.162947836 |
| Cu | 1.274213729  | 3.669677473  | -6.276427430 |
| Cu | -1.274213729 | 3.669677473  | -6.276427430 |
| Cu | 0.000000000  | 1.465022417  | -6.275445200 |
| Cu | 0.000000000  | 0.001633676  | -2.139374884 |
| Cu | 1.282921986  | 0.734647356  | -4.177603567 |
| Cu | -1.282921986 | 0.734647356  | -4.177603567 |
| Cu | 0.000000000  | -1.477596256 | -4.176280077 |
| Cu | 0.000000000  | -2.971702346 | 0.014630765  |
| Cu | 1.266117352  | -2.190246319 | -2.065777051 |
| Cu | -1.266117352 | -2.190246319 | -2.065777051 |
| Cu | -2.541446745 | 4.412005393  | -2.084258761 |
| Cu | -2.547476859 | 2.935796537  | -4.151979425 |
| Cu | -2.563291966 | 1.486948352  | 0.022195893  |
| Cu | -1.266182032 | 2.191119497  | -2.082641257 |
| Cu | -3.818012513 | 2.209877998  | -2.079741135 |
| Cu | -2.529180515 | 0.003253259  | -2.061557293 |
| Cu | -1.275880936 | -0.745672202 | 0.094974154  |
| Cu | -3.813586382 | -0.731657725 | 0.026342104  |
| Cu | -2.542983066 | -2.933269422 | 0.034875697  |
| Cu | -3.818760304 | 3.679825568  | 0.028151722  |

|    |              |              |              |
|----|--------------|--------------|--------------|
| Cu | 5.088769000  | 2.934158222  | -4.157197710 |
| Cu | 3.815354947  | 3.668367345  | -6.284972070 |
| Cu | 5.088769000  | 1.467956862  | -6.263081721 |
| Cu | 5.088769000  | 0.002217893  | -2.069854068 |
| Cu | 3.815071059  | 0.726852564  | -4.140865955 |
| Cu | 5.088769000  | -1.477308784 | -4.148144298 |
| Cu | 5.088769000  | -2.932066787 | 0.003917049  |
| Cu | 3.815266442  | -2.198802880 | -2.080382089 |
| Cu | 2.541446745  | 4.412005393  | -2.084258761 |
| Cu | 2.547476859  | 2.935796537  | -4.151979425 |
| Cu | 2.563291966  | 1.486948352  | 0.022195893  |
| Cu | 3.818012513  | 2.209877998  | -2.079741135 |
| Cu | 1.266182032  | 2.191119497  | -2.082641257 |
| Cu | 2.529180515  | 0.003253259  | -2.061557293 |
| Cu | 3.813586382  | -0.731657725 | 0.026342104  |
| Cu | 1.275880936  | -0.745672202 | 0.094974154  |
| Cu | 2.542983066  | -2.933269422 | 0.034875697  |
| Cu | 0.000000000  | 4.394670279  | -2.088898946 |
| Cu | 1.284521937  | 3.672618363  | 0.038112461  |
| Cu | -1.284521937 | 3.672618363  | 0.038112461  |
| Cu | 0.000000000  | 1.488243806  | 0.077264072  |
| Cu | 5.088769000  | 4.413963070  | -2.090528480 |
| Cu | 3.818760304  | 3.679825568  | 0.028151722  |
| Cu | 5.088769000  | 1.473581672  | 0.031416005  |
| C  | 0.000000000  | 0.036994544  | 1.484629476  |
| O  | 0.000000000  | 0.017824695  | 2.663295458  |
| Cu | -1.282964793 | 5.142930131  | -4.156269962 |
| Cu | 3.819783676  | 5.135392270  | -4.158888428 |
| Cu | 1.282964793  | 5.142930131  | -4.156269962 |
| Cu | 0.000000000  | 5.842303650  | 0.014630765  |
| Cu | 1.266117352  | 6.623759677  | -2.065777051 |
| Cu | -1.266117352 | 6.623759677  | -2.065777051 |
| Cu | -2.542983066 | 5.880736574  | 0.034875697  |
| Cu | 5.088769000  | 5.881939209  | 0.003917049  |
| Cu | 3.815266442  | 6.615203116  | -2.080382089 |
| Cu | 2.542983066  | 5.880736574  | 0.034875697  |
| Cu | 6.362466410  | 0.726852564  | -4.140865955 |
| Cu | 6.362271027  | -2.198802880 | -2.080382089 |
| Cu | 7.614245503  | 1.486948352  | 0.022195893  |
| Cu | 6.359524956  | 2.209877998  | -2.079741135 |
| Cu | 7.648356954  | 0.003253259  | -2.061557293 |
| Cu | 6.363951087  | -0.731657725 | 0.026342104  |
| Cu | 6.358777165  | 3.679825568  | 0.028151722  |

## CO\_on\_Cu\_pos2.xyz

90

Atoms

|    |              |              |              |
|----|--------------|--------------|--------------|
| Cu | -3.816576469 | -2.196541926 | -2.090528480 |
| Cu | -5.086585165 | -2.930679428 | 0.028151722  |
| Cu | -3.816576469 | -5.136923324 | 0.031416005  |
| Cu | -3.816576469 | 2.205718893  | -2.069854068 |
| Cu | -3.816576469 | 0.726192216  | -4.148144298 |
| Cu | -3.816576469 | -0.728565787 | 0.003917049  |
| Cu | -5.090079027 | 0.004698120  | -2.080382089 |
| Cu | -5.091759087 | 1.471843275  | 0.026342104  |
| Cu | -6.362362403 | -0.729768422 | 0.034875697  |
| Cu | -3.816576469 | 3.677082672  | 0.031416005  |
| Cu | 1.272192000  | -3.675066866 | -4.162947836 |
| Cu | 2.546405729  | -2.940827523 | -6.276427430 |
| Cu | -0.002021729 | -2.940827523 | -6.276427430 |
| Cu | -1.269254745 | -2.198499603 | -2.084258761 |
| Cu | -1.275284859 | -3.674708459 | -4.151979425 |
| Cu | -1.291099966 | -5.123556644 | 0.022195893  |
| Cu | 0.006009968  | -4.419385499 | -2.082641257 |
| Cu | -2.545820513 | -4.400626998 | -2.079741135 |
| Cu | -2.546568304 | -2.930679428 | 0.028151722  |
| Cu | 3.813638745  | -2.198499603 | -2.084258761 |
| Cu | 3.819668859  | -3.674708459 | -4.151979425 |
| Cu | 3.835483966  | -5.123556644 | 0.022195893  |
| Cu | 5.090204513  | -4.400626998 | -2.079741135 |
| Cu | 2.538374032  | -4.419385499 | -2.082641257 |
| Cu | 1.272192000  | -2.215834717 | -2.088898946 |
| Cu | 2.556713937  | -2.937886633 | 0.038112461  |
| Cu | -0.012329937 | -2.937886633 | 0.038112461  |
| Cu | 1.272192000  | -5.122261190 | 0.077264072  |
| Cu | 6.360961000  | -2.196541926 | -2.090528480 |
| Cu | 5.090952304  | -2.930679428 | 0.028151722  |
| Cu | 1.272192000  | -0.745629104 | -6.268580725 |
| Cu | -1.281619918 | 3.672506719  | -6.272164391 |
| Cu | -1.269046878 | 0.729278602  | -4.149060958 |
| Cu | -0.001627498 | 1.462802720  | -6.274401378 |
| Cu | -2.545174788 | 1.461942306  | -6.263756387 |
| Cu | -1.276491123 | -0.740569523 | -6.286853345 |
| Cu | -0.010772793 | -1.467574865 | -4.156269962 |
| Cu | -2.547591676 | -1.475112726 | -4.158888428 |
| Cu | -2.542879059 | 2.930353564  | -4.140865955 |
| Cu | -2.543074442 | 0.004698120  | -2.080382089 |
| Cu | 3.826003918  | 3.672506719  | -6.272164391 |
| Cu | 3.813430878  | 0.729278602  | -4.149060958 |
| Cu | 5.089558788  | 1.461942306  | -6.263756387 |
| Cu | 2.546011498  | 1.462802720  | -6.274401378 |
| Cu | 3.820875123  | -0.740569523 | -6.286853345 |
| Cu | 5.091975676  | -1.475112726 | -4.158888428 |
| Cu | 2.555156793  | -1.467574865 | -4.156269962 |



|    |              |              |              |
|----|--------------|--------------|--------------|
| Cu | 1.272192000  | 5.138939130  | -4.162947836 |
| Cu | 1.272192000  | 3.668523417  | -6.275445200 |
| Cu | 1.272192000  | 2.205134676  | -2.139374884 |
| Cu | 2.555113986  | 2.938148356  | -4.177603567 |
| Cu | -0.010729986 | 2.938148356  | -4.177603567 |
| Cu | 1.272192000  | 0.725904744  | -4.176280077 |
| Cu | 1.272192000  | -0.768201346 | 0.014630765  |
| Cu | 2.538309352  | 0.013254681  | -2.065777051 |
| Cu | 0.006074648  | 0.013254681  | -2.065777051 |
| Cu | -1.269254745 | 6.615506393  | -2.084258761 |
| Cu | -1.275284859 | 5.139297537  | -4.151979425 |
| Cu | -1.291099966 | 3.690449352  | 0.022195893  |
| Cu | 0.006009968  | 4.394620497  | -2.082641257 |
| Cu | -2.545820513 | 4.413378998  | -2.079741135 |
| Cu | -1.256988515 | 2.206754259  | -2.061557293 |
| Cu | -0.003688936 | 1.457828798  | 0.094974154  |
| Cu | -2.541394382 | 1.471843275  | 0.026342104  |
| Cu | -1.270791066 | -0.729768422 | 0.034875697  |
| Cu | -2.546568304 | 5.883326568  | 0.028151722  |
| Cu | 6.360961000  | 2.205718893  | -2.069854068 |
| Cu | 5.087263059  | 2.930353564  | -4.140865955 |
| Cu | 6.360961000  | 0.726192216  | -4.148144298 |
| Cu | 6.360961000  | -0.728565787 | 0.003917049  |
| Cu | 5.087458442  | 0.004698120  | -2.080382089 |
| Cu | 3.813638745  | 6.615506393  | -2.084258761 |
| Cu | 3.819668859  | 5.139297537  | -4.151979425 |
| Cu | 3.835483966  | 3.690449352  | 0.022195893  |
| Cu | 5.090204513  | 4.413378998  | -2.079741135 |
| Cu | 2.538374032  | 4.394620497  | -2.082641257 |
| Cu | 3.801372515  | 2.206754259  | -2.061557293 |
| Cu | 5.085778382  | 1.471843275  | 0.026342104  |
| Cu | 2.548072936  | 1.457828798  | 0.094974154  |
| Cu | 3.815175066  | -0.729768422 | 0.034875697  |
| Cu | 1.272192000  | 6.598171279  | -2.08898946  |
| Cu | 2.556713937  | 5.876119363  | 0.038112461  |
| Cu | -0.012329937 | 5.876119363  | 0.038112461  |
| Cu | 1.272192000  | 3.691744806  | 0.077264072  |
| Cu | 5.090952304  | 5.883326568  | 0.028151722  |
| Cu | 6.360961000  | 3.677082672  | 0.031416005  |
| C  | 1.272192000  | 2.240495544  | 1.484629476  |
| O  | 1.272192000  | 2.221325695  | 2.663295458  |
| Cu | 7.634463027  | 0.004698120  | -2.080382089 |
| Cu | 7.636143087  | 1.471843275  | 0.026342104  |

## CO\_on\_Cu\_top\_pos.xyz

90

Atoms

|    |              |              |              |
|----|--------------|--------------|--------------|
| Cu | -5.084483159 | -0.003536166 | -2.103755725 |
| Cu | -5.081224156 | -2.943025226 | -0.041360513 |
| Cu | -6.331310791 | -0.737847117 | -0.051704229 |
| Cu | -5.082300635 | 1.468921528  | -0.040405588 |
| Cu | -2.543867882 | -4.412420577 | -2.095385949 |
| Cu | -3.816575879 | -5.144660052 | -0.043240001 |
| Cu | 2.544015698  | -4.418866824 | -2.102400810 |
| Cu | 0.000367056  | -4.418868723 | -2.102399110 |
| Cu | 1.272190354  | -5.139855037 | -0.044951761 |
| Cu | -1.283023538 | -5.144049508 | -0.035709792 |
| Cu | 5.088251236  | -4.412419935 | -2.095385193 |
| Cu | 3.827405920  | -5.144049491 | -0.035710543 |
| Cu | -0.000719597 | -2.940336988 | -6.197915002 |
| Cu | -2.544640443 | 1.468246621  | -6.191488710 |
| Cu | -2.545254605 | -1.460185026 | -4.130196163 |
| Cu | -1.277390060 | -0.734146579 | -6.195495860 |
| Cu | -1.272189098 | -3.662919210 | -4.135331277 |
| Cu | -3.816579737 | 0.748674192  | -4.138958920 |
| Cu | -3.816580068 | -2.212284627 | -2.092067316 |
| Cu | 2.545149151  | 1.474235467  | -6.200493764 |
| Cu | 2.547358888  | -1.460498019 | -4.143768435 |
| Cu | 3.821773454  | -0.734144280 | -6.195497220 |
| Cu | 1.272188470  | -0.733890811 | -6.190091260 |
| Cu | 2.545101369  | -2.940335734 | -6.197916157 |
| Cu | 3.816571672  | -3.662919142 | -4.135333055 |
| Cu | 1.272190603  | -3.655951223 | -4.134871447 |
| Cu | -0.000099747 | 2.943691813  | -4.134841384 |
| Cu | 1.272192467  | 3.674079874  | -6.191457308 |
| Cu | -1.269806257 | 3.673362705  | -6.187744129 |
| Cu | -0.000767820 | 1.474235439  | -6.200495248 |
| Cu | 0.006738176  | -0.015559225 | -2.079532636 |
| Cu | 1.272193963  | 0.743933182  | -4.143074109 |
| Cu | -1.262524489 | 0.739230832  | -4.134979682 |
| Cu | -0.002976666 | -1.460496545 | -4.143767210 |
| Cu | -0.019721083 | -2.966249985 | -0.051584695 |
| Cu | 1.272193012  | -2.200228316 | -2.081376213 |
| Cu | -1.266289198 | -2.207269466 | -2.095999255 |
| Cu | -2.543867882 | 4.401585419  | -2.095385949 |
| Cu | -2.544735294 | 2.946130008  | -4.135815520 |
| Cu | -2.550850331 | 1.468921204  | -0.040403011 |
| Cu | -1.277625131 | 2.193901748  | -2.101545105 |
| Cu | -3.816575212 | 2.199102483  | -2.095286265 |
| Cu | -2.548668939 | -0.003535881 | -2.103757197 |
| Cu | -1.301838441 | -0.737846824 | -0.051701969 |
| Cu | -3.816567560 | -0.735562798 | -0.035174086 |
| Cu | -2.551927403 | -2.943024773 | -0.041364601 |
| Cu | -3.816575879 | 3.669345944  | -0.043240001 |

|    |              |              |              |
|----|--------------|--------------|--------------|
| Cu | 5.089118422  | 2.946129847  | -4.135817361 |
| Cu | 3.814189291  | 3.673362406  | -6.187744895 |
| Cu | 5.089024368  | 1.468246860  | -6.191489688 |
| Cu | 5.093054310  | -0.003536166 | -2.103755725 |
| Cu | 3.806906844  | 0.739230943  | -4.134979397 |
| Cu | 5.089636910  | -1.460183824 | -4.130198752 |
| Cu | 5.096313313  | -2.943025226 | -0.041360513 |
| Cu | 3.810671210  | -2.207268431 | -2.096000559 |
| Cu | 2.544015698  | 4.395139172  | -2.102400810 |
| Cu | 2.544482890  | 2.943692930  | -4.134839724 |
| Cu | 2.561402914  | 1.495443514  | -0.052506729 |
| Cu | 3.822007649  | 2.193902917  | -2.101546773 |
| Cu | 1.272191099  | 2.183157975  | -2.098206209 |
| Cu | 2.537643637  | -0.015559919 | -2.079535438 |
| Cu | 3.846226678  | -0.737847117 | -0.051704229 |
| Cu | 1.272192000  | -0.734500000 | 0.011352187  |
| Cu | 2.564109579  | -2.966249782 | -0.051584641 |
| Cu | 0.000367056  | 4.395137273  | -2.102399110 |
| Cu | 1.272190354  | 3.674150959  | -0.044951761 |
| Cu | -1.283023538 | 3.669956488  | -0.035709792 |
| Cu | -0.017012938 | 1.495444311  | -0.052503112 |
| Cu | 5.088251236  | 4.401586061  | -2.095385193 |
| Cu | 3.827405920  | 3.669956505  | -0.035710543 |
| Cu | 5.095236834  | 1.468921528  | -0.040405588 |
| C  | 1.272192000  | -0.734500000 | 1.846487463  |
| O  | 1.272192000  | -0.734500000 | 3.000741735  |
| Cu | -1.272189098 | 5.151086786  | -4.135331277 |
| Cu | 3.816571672  | 5.151086854  | -4.135333055 |
| Cu | 1.272190603  | 5.158054773  | -4.134871447 |
| Cu | -0.019721083 | 5.847756011  | -0.051584695 |
| Cu | 1.272193012  | 6.613777680  | -2.081376213 |
| Cu | -1.266289198 | 6.606736530  | -2.095999255 |
| Cu | -2.551927403 | 5.870981223  | -0.041364601 |
| Cu | 5.096313313  | 5.870980770  | -0.041360513 |
| Cu | 3.810671210  | 6.606737565  | -2.096000559 |
| Cu | 2.564109579  | 5.847756214  | -0.051584641 |
| Cu | 6.360957732  | 0.748674192  | -4.138958920 |
| Cu | 6.360957401  | -2.212284627 | -2.092067316 |
| Cu | 7.626687138  | 1.468921204  | -0.040403011 |
| Cu | 6.360962257  | 2.199102483  | -2.095286265 |
| Cu | 7.628868530  | -0.003535881 | -2.103757197 |
| Cu | 6.360969909  | -0.735562798 | -0.035174086 |
| Cu | 6.360961590  | 3.669345944  | -0.043240001 |

## Ethene\_on\_Cu.xyz

94

Atoms

|    |              |              |              |
|----|--------------|--------------|--------------|
| H  | 0.932171426  | 2.718373826  | 2.368643939  |
| H  | -0.932171426 | 2.718373826  | 2.368643939  |
| H  | 0.932273354  | 0.217323902  | 2.367179621  |
| H  | -0.932273354 | 0.217323902  | 2.367179621  |
| C  | 0.000000000  | 2.157745046  | 2.239792571  |
| C  | 0.000000000  | 0.778072516  | 2.238905720  |
| Cu | 0.000000000  | 1.465492234  | 0.139122933  |
| Cu | -5.088768469 | 1.468497375  | -0.032872568 |
| Cu | 5.088769000  | 1.468497375  | -0.032872568 |
| Cu | -2.549503221 | -2.941531310 | -0.039343737 |
| Cu | 2.549503221  | -2.941531310 | -0.039343737 |
| Cu | -2.549503221 | 5.872474686  | -0.039343737 |
| Cu | 2.549503221  | 5.872474686  | -0.039343737 |
| Cu | -6.356703573 | -0.738804222 | -0.039671597 |
| Cu | -3.820833896 | -0.738804222 | -0.039671597 |
| Cu | 3.820833896  | -0.738804222 | -0.039671597 |
| Cu | 6.356703573  | -0.738804222 | -0.039671597 |
| Cu | -5.088768469 | -2.941784893 | -0.039793734 |
| Cu | 5.088769000  | -2.941784893 | -0.039793734 |
| Cu | 5.088769000  | 5.872221103  | -0.039793734 |
| Cu | -3.818331118 | -5.143871176 | -0.040988095 |
| Cu | 3.818331118  | -5.143871176 | -0.040988095 |
| Cu | -3.818331118 | 3.670134820  | -0.040988095 |
| Cu | 3.818331118  | 3.670134820  | -0.040988095 |
| Cu | 6.359206351  | 3.670134820  | -0.040988095 |
| Cu | 0.000000000  | -2.935674172 | -0.056166809 |
| Cu | 0.000000000  | 5.878331824  | -0.056166809 |
| Cu | -2.578736575 | 1.461950616  | -0.067283609 |
| Cu | 2.578736575  | 1.461950616  | -0.067283609 |
| Cu | 7.598800894  | 1.461950616  | -0.067283609 |
| Cu | -1.292199668 | -0.755358235 | -0.071544186 |
| Cu | 1.292199668  | -0.755358235 | -0.071544186 |
| Cu | 1.282732200  | -5.119915627 | -0.073885327 |
| Cu | -1.282732200 | -5.119915627 | -0.073885327 |
| Cu | 1.282732200  | 3.694090369  | -0.073885327 |
| Cu | -1.282732200 | 3.694090369  | -0.073885327 |
| Cu | 0.000000000  | 0.012233935  | -2.064651070 |
| Cu | -1.255976980 | 2.181842376  | -2.065144120 |
| Cu | 1.255976980  | 2.181842376  | -2.065144120 |
| Cu | -5.088768469 | -0.006371146 | -2.096981482 |
| Cu | 5.088769000  | -0.006371146 | -2.096981482 |
| Cu | 5.088769000  | -4.408156449 | -2.098586059 |
| Cu | 5.088769000  | 4.405849547  | -2.098586059 |
| Cu | -3.818375451 | -2.209139523 | -2.098916429 |
| Cu | 3.818375451  | -2.209139523 | -2.098916429 |
| Cu | 3.818375451  | 6.604866473  | -2.098916429 |
| Cu | 6.359162018  | -2.209139523 | -2.098916429 |

|    |              |              |              |
|----|--------------|--------------|--------------|
| Cu | -2.544977641 | -0.007611137 | -2.106466714 |
| Cu | 2.544977641  | -0.007611137 | -2.106466714 |
| Cu | 7.632559828  | -0.007611137 | -2.106466714 |
| Cu | -3.820829502 | 2.201540936  | -2.107299921 |
| Cu | 3.820829502  | 2.201540936  | -2.107299921 |
| Cu | 6.356707967  | 2.201540936  | -2.107299921 |
| Cu | -2.549566829 | -4.416897200 | -2.107708286 |
| Cu | 2.549566829  | -4.416897200 | -2.107708286 |
| Cu | -2.549566829 | 4.397108796  | -2.107708286 |
| Cu | 2.549566829  | 4.397108796  | -2.107708286 |
| Cu | 1.274227847  | -2.216460422 | -2.109323434 |
| Cu | -1.274227847 | -2.216460422 | -2.109323434 |
| Cu | 1.274227847  | 6.597545574  | -2.109323434 |
| Cu | -1.274227847 | 6.597545574  | -2.109323434 |
| Cu | 0.000000000  | -4.421393683 | -2.114878112 |
| Cu | 0.000000000  | 4.392612313  | -2.114878112 |
| Cu | 0.000000000  | -1.448548384 | -4.127516692 |
| Cu | -2.532763198 | 2.940085888  | -4.129781879 |
| Cu | 2.532763198  | 2.940085888  | -4.129781879 |
| Cu | -3.816204053 | 0.743536084  | -4.133466668 |
| Cu | 3.816204053  | 0.743536084  | -4.133466668 |
| Cu | 6.361333416  | 0.743536084  | -4.133466668 |
| Cu | 1.270600147  | 0.743529934  | -4.133915502 |
| Cu | -1.270600147 | 0.743529934  | -4.133915502 |
| Cu | 5.088769000  | -1.458959812 | -4.136071392 |
| Cu | 0.000000000  | 2.941689171  | -4.137125113 |
| Cu | 3.816373854  | -3.663501926 | -4.137319326 |
| Cu | 3.816373854  | 5.150504070  | -4.137319326 |
| Cu | 5.088769000  | 2.953803212  | -4.137646564 |
| Cu | -2.544558651 | -1.460528703 | -4.138293806 |
| Cu | 2.544558651  | -1.460528703 | -4.138293806 |
| Cu | -1.272891338 | -3.665836466 | -4.141727126 |
| Cu | 1.272891338  | -3.665836466 | -4.141727126 |
| Cu | -1.272891338 | 5.148169530  | -4.141727126 |
| Cu | 1.272891338  | 5.148169530  | -4.141727126 |
| Cu | 5.088769000  | 1.471599267  | -6.184029688 |
| Cu | 3.814970021  | 3.672577417  | -6.189345307 |
| Cu | 0.000000000  | 1.469666765  | -6.191736651 |
| Cu | 3.817197061  | -0.731117496 | -6.192689942 |
| Cu | -2.545483757 | 1.469350362  | -6.192911068 |
| Cu | 2.545483757  | 1.469350362  | -6.192911068 |
| Cu | 0.000000000  | -2.932552318 | -6.193016291 |
| Cu | 2.541950166  | -2.935753927 | -6.193670438 |
| Cu | -1.271182760 | -0.734066038 | -6.195810059 |
| Cu | 1.271182760  | -0.734066038 | -6.195810059 |
| Cu | 1.270609134  | 3.677052443  | -6.198798358 |
| Cu | -1.270609134 | 3.677052443  | -6.198798358 |

# H2O\_layer\_on\_Cu.xyz

106

Atoms

|    |              |             |              |
|----|--------------|-------------|--------------|
| O3 | -0.21309684  | -2.9080808  | 2.9582285    |
| O3 | 1.3702311    | 3.7619994   | 2.9066158    |
| H  | 0.77494179   | 4.5914178   | 2.9063808    |
| O3 | 5.3932614    | 1.5389801   | 2.8704632    |
| H  | 0.31324803   | -2.0901607  | 2.7190321    |
| H  | 4.5263366    | 0.17765818  | 2.5493874    |
| H  | 0.57044062   | 2.5339815   | 2.5170967    |
| H  | 4.8739872    | 2.3035264   | 2.5149796    |
| H  | -0.87276509  | 1.7514874   | 2.5108639    |
| H  | 4.5205991    | -1.4335534  | 2.4994446    |
| H  | 2.2496744    | -0.66149836 | 2.4231233    |
| H  | 0.85437544   | 0.18706282  | 2.3933623    |
| O3 | 3.9684818    | -0.64339094 | 2.3029024    |
| H  | -0.91847428  | -2.9514921  | 2.2642285    |
| O  | 0.067247715  | 1.6563463   | 2.2387234    |
| H  | 6.146552     | 1.500709    | 2.2190795    |
| H  | 2.0544457    | 3.943784    | 2.2117518    |
| O  | 1.2729137    | -0.70967671 | 2.1935918    |
| Cu | -0.008102171 | 1.4961207   | 0.024227366  |
| Cu | -6.332219    | -0.73650622 | 0.021716688  |
| Cu | 3.8453185    | -0.73650622 | 0.021716688  |
| Cu | 1.2674004    | -0.77013725 | 0.021340658  |
| Cu | 1.2732562    | -5.1521207  | -0.007057577 |
| Cu | -3.8155125   | 3.6618853   | -0.007057577 |
| Cu | 6.362025     | 3.6618853   | -0.007057577 |
| Cu | -2.5509841   | -2.9466371  | -0.012553735 |
| Cu | 2.5377846    | 5.8673689   | -0.012553735 |
| Cu | 3.820988     | 3.670119    | -0.015295562 |
| Cu | -1.2677807   | -5.143887   | -0.015295562 |
| Cu | -5.070914    | -2.9636327  | -0.033447027 |
| Cu | 0.017854766  | 5.8503733   | -0.033447027 |
| Cu | 5.1066235    | -2.9636327  | -0.033447027 |
| Cu | -2.5670745   | 1.4626615   | -0.042834878 |
| Cu | 7.610463     | 1.4626615   | -0.042834878 |
| Cu | -3.8005442   | -0.73955976 | -0.042970929 |
| Cu | 6.3769933    | -0.73955976 | -0.042970929 |
| Cu | -1.3083429   | -0.75561156 | -0.051373324 |
| Cu | -1.3000673   | 3.6868603   | -0.053558403 |
| Cu | 3.7887014    | -5.1271457  | -0.053558403 |
| Cu | -2.5231197   | 5.8352368   | -0.060821865 |
| Cu | 2.565649     | -2.9787692  | -0.060821865 |
| Cu | 2.5663357    | 1.5031683   | -0.089355359 |
| Cu | -0.019054143 | -2.9643205  | -0.092330587 |
| Cu | 5.0697146    | 5.8496855   | -0.092330587 |
| Cu | 5.0941726    | 1.4893015   | -0.10275543  |
| Cu | -5.0833649   | 1.4893015   | -0.10275543  |
| Cu | 1.2786505    | 3.6887886   | -0.10995456  |

|    |              |              |             |
|----|--------------|--------------|-------------|
| Cu | -3.8101182   | -5.1252174   | -0.10995456 |
| Cu | 0.006097735  | -0.007367742 | -2.0382649  |
| Cu | 2.5482564    | -0.026550144 | -2.046403   |
| Cu | -1.2639554   | 6.6125595    | -2.0745294  |
| Cu | 3.8248133    | -2.2014465   | -2.0745294  |
| Cu | -1.2636089   | 2.1885005    | -2.0762711  |
| Cu | 1.2785429    | -2.2035972   | -2.0794983  |
| Cu | -5.0920913   | -0.011106636 | -2.0891758  |
| Cu | 5.0854462    | -0.011106636 | -2.0891758  |
| Cu | -3.8173508   | -2.2122449   | -2.0916883  |
| Cu | 6.3601867    | -2.2122449   | -2.0916883  |
| Cu | 1.2714179    | 6.6017611    | -2.0916883  |
| Cu | 5.0924068    | 4.396036     | -2.0937158  |
| Cu | 0.003638066  | -4.41797     | -2.0937158  |
| Cu | 1.2577229    | 2.1800499    | -2.0980626  |
| Cu | -2.5527554   | 4.4041106    | -2.1025998  |
| Cu | 2.5360133    | -4.4098954   | -2.1025998  |
| Cu | 3.8067129    | 6.6034891    | -2.1061827  |
| Cu | -1.2820558   | -2.2105169   | -2.1061827  |
| Cu | -2.5482838   | 6.6741e-05   | -2.1082381  |
| Cu | 7.6292537    | 6.6741e-05   | -2.1082381  |
| Cu | 6.3695314    | 2.2095615    | -2.1185378  |
| Cu | -3.8080061   | 2.2095615    | -2.1185378  |
| Cu | 3.8174631    | 2.2033879    | -2.1251293  |
| Cu | -2.5363142   | -4.4166461   | -2.1254417  |
| Cu | 2.5524545    | 4.3973599    | -2.1254417  |
| Cu | -0.008470832 | 4.3911785    | -2.127307   |
| Cu | 5.0802979    | -4.4228275   | -2.127307   |
| Cu | 0.001199753  | -1.4548397   | -4.1221697  |
| Cu | 1.2789134    | 0.73023277   | -4.1238624  |
| Cu | -1.2591637   | 0.74073558   | -4.1242744  |
| Cu | 2.5465502    | -1.4624263   | -4.1299266  |
| Cu | 3.8053318    | 0.73407563   | -4.1311985  |
| Cu | 3.8186656    | -3.6550199   | -4.1312901  |
| Cu | -1.2701031   | 5.1589861    | -4.1312901  |
| Cu | 5.0883345    | -1.4592031   | -4.1336507  |
| Cu | -2.5466409   | -1.460365    | -4.1337052  |
| Cu | -2.5298387   | 2.9441776    | -4.1361324  |
| Cu | 1.2701228    | 5.1520932    | -4.137024   |
| Cu | 6.3531772    | 0.74530413   | -4.1370902  |
| Cu | -3.8243603   | 0.74530413   | -4.1370902  |
| Cu | 1.2720984    | -3.6542549   | -4.1397182  |
| Cu | 5.0878871    | 2.9523062    | -4.1443887  |
| Cu | 2.5323936    | 2.9392637    | -4.1451563  |
| Cu | 3.8169303    | 5.1508531    | -4.1478868  |
| Cu | -1.2718384   | -3.6631529   | -4.1478868  |
| Cu | 0.00089724   | 2.9400295    | -4.1486793  |
| Cu | -1.2698003   | -0.73066546  | -6.1809111  |
| Cu | -2.5395705   | 1.4693615    | -6.181616   |
| Cu | 5.0834333    | 1.4728463    | -6.1863838  |

|    |             |             |            |
|----|-------------|-------------|------------|
| Cu | 3.8129855   | 3.678651    | -6.1882022 |
| Cu | 1.271877    | -0.73361753 | -6.1902918 |
| Cu | 0.002254778 | 1.4704062   | -6.1908016 |
| Cu | 3.8143664   | -0.73183611 | -6.1939976 |
| Cu | 0.001202717 | -2.9289915  | -6.197116  |
| Cu | 2.5418408   | 1.4724854   | -6.197573  |
| Cu | 2.5416578   | -2.9328591  | -6.1983888 |
| Cu | 1.2711131   | 3.6823332   | -6.2001023 |
| Cu | -1.2683739  | 3.6775691   | -6.2022893 |



## HCOO\_on\_Cu.xyz

92

Atoms

|    |              |              |              |
|----|--------------|--------------|--------------|
| H  | 1.9337868    | 0.37836646   | 3.679952     |
| C  | 1.9282263    | 0.37469549   | 2.5682538    |
| O  | 1.3473925    | -0.60822679  | 2.0194661    |
| O  | 2.5026267    | 1.3542863    | 2.0061444    |
| Cu | 1.2523825    | -0.76631669  | 0.025121599  |
| Cu | 2.5593332    | 1.4937753    | 0.012662949  |
| Cu | 6.3634708    | -0.73867081  | -0.039481306 |
| Cu | -3.8140667   | -0.73867081  | -0.039481306 |
| Cu | -2.5462876   | 1.4666405    | -0.040479623 |
| Cu | 7.6312499    | 1.4666405    | -0.040479623 |
| Cu | -2.5488883   | -2.9457916   | -0.044386542 |
| Cu | 2.5398804    | 5.8682144    | -0.044386542 |
| Cu | 1.275692     | -5.144229    | -0.044797914 |
| Cu | 6.3644608    | 3.669777     | -0.044797914 |
| Cu | -3.8130767   | 3.669777     | -0.044797914 |
| Cu | 0.011010366  | 5.871421     | -0.04486358  |
| Cu | -5.0777584   | -2.942585    | -0.04486358  |
| Cu | 5.0997791    | -2.942585    | -0.04486358  |
| Cu | -1.2822613   | 3.6654395    | -0.045460367 |
| Cu | 3.8065074    | -5.1485665   | -0.045460367 |
| Cu | 5.1177066    | 1.4642956    | -0.058811468 |
| Cu | -5.0598309   | 1.4642956    | -0.058811468 |
| Cu | -1.3013834   | -0.74575503  | -0.061826563 |
| Cu | -0.025251557 | -2.9684036   | -0.06364488  |
| Cu | 5.0635172    | 5.8456024    | -0.06364488  |
| Cu | -2.5269057   | 5.8526429    | -0.068127812 |
| Cu | 2.561863     | -2.9613631   | -0.068127812 |
| Cu | 3.8372296    | 3.6933237    | -0.068145599 |
| Cu | -1.2515391   | -5.1206823   | -0.068145599 |
| Cu | -3.8294857   | -5.1241841   | -0.074246607 |
| Cu | 1.259283     | 3.6898219    | -0.074246607 |
| Cu | -6.324216    | -0.76105894  | -0.078208043 |
| Cu | 3.8533215    | -0.76105894  | -0.078208043 |
| Cu | -0.033899519 | 1.4822451    | -0.080681359 |
| Cu | 2.5360411    | -0.006805613 | -2.0614337   |
| Cu | 1.2721113    | -2.1938436   | -2.0751238   |
| Cu | 3.8035105    | 2.1841026    | -2.0769244   |
| Cu | 0.013271497  | -0.018769667 | -2.0803677   |
| Cu | 1.2841718    | 2.1814778    | -2.0877332   |
| Cu | -3.8142378   | -2.2094509   | -2.0980476   |
| Cu | 6.3632997    | -2.2094509   | -2.0980476   |
| Cu | 1.2745309    | 6.6045551    | -2.0980476   |
| Cu | 2.5438803    | -4.4099365   | -2.0991451   |
| Cu | -2.5448884   | 4.4040695    | -2.0991451   |
| Cu | 6.3603244    | 2.2039962    | -2.1014789   |
| Cu | -3.8172131   | 2.2039962    | -2.1014789   |
| Cu | 7.6325304    | -0.002455374 | -2.1019966   |

|    |              |              |            |
|----|--------------|--------------|------------|
| Cu | -2.5450071   | -0.002455374 | -2.1019966 |
| Cu | -1.270561    | -2.2094406   | -2.1024076 |
| Cu | 3.8182077    | 6.6045654    | -2.1024076 |
| Cu | 5.0868933    | -0.001948857 | -2.1038397 |
| Cu | -5.0906442   | -0.001948857 | -2.1038397 |
| Cu | -1.2727437   | 6.6024771    | -2.1078168 |
| Cu | 3.816025     | -2.2115289   | -2.1078168 |
| Cu | 5.0922772    | 4.4011073    | -2.1081439 |
| Cu | 0.003508466  | -4.4128987   | -2.1081439 |
| Cu | -1.2720529   | 2.1966474    | -2.1081783 |
| Cu | -2.5435305   | -4.4213058   | -2.1134752 |
| Cu | 2.5452382    | 4.3927002    | -2.1134752 |
| Cu | -0.002691627 | 4.3952009    | -2.1137121 |
| Cu | 5.0860771    | -4.4188051   | -2.1137121 |
| Cu | 5.074284     | 2.9384648    | -4.1280764 |
| Cu | -1.2626481   | 0.73537234   | -4.1297254 |
| Cu | 6.357925     | 0.74560432   | -4.1311302 |
| Cu | -3.8196125   | 0.74560432   | -4.1311302 |
| Cu | -2.5435473   | 2.9472912    | -4.1314223 |
| Cu | 1.2704826    | -3.6537141   | -4.1316197 |
| Cu | -2.5425041   | -1.4600037   | -4.1322842 |
| Cu | 5.0867744    | -1.4607347   | -4.132344  |
| Cu | 3.8074625    | 0.73860044   | -4.1328774 |
| Cu | 1.2728283    | 5.1495618    | -4.1343866 |
| Cu | 2.5437756    | -1.455624    | -4.1352329 |
| Cu | -1.2697987   | -3.6646842   | -4.1359321 |
| Cu | 3.81897      | 5.1493218    | -4.1359321 |
| Cu | 0.010319913  | 2.9399644    | -4.1367134 |
| Cu | 1.2728188    | 0.73863279   | -4.1376493 |
| Cu | 0.000894593  | -1.4636773   | -4.1400033 |
| Cu | -1.2742463   | 5.1490263    | -4.1408209 |
| Cu | 3.8145224    | -3.6649797   | -4.1408209 |
| Cu | 2.543151     | 2.9434963    | -4.1416055 |
| Cu | -2.5414203   | 1.4696426    | -6.1731964 |
| Cu | -1.2710665   | 3.6749621    | -6.1821492 |
| Cu | 5.0884259    | 1.4717207    | -6.185422  |
| Cu | -1.2722733   | -0.73055525  | -6.1902638 |
| Cu | 2.5437179    | 1.474192     | -6.1908701 |
| Cu | 3.8180924    | -0.7310716   | -6.191467  |
| Cu | 1.2716836    | -0.73359655  | -6.1923167 |
| Cu | -0.001363334 | 1.4730589    | -6.1927503 |
| Cu | 1.272981     | 3.6804951    | -6.1941262 |
| Cu | 0.00240214   | -2.9341346   | -6.1942418 |
| Cu | 3.8154557    | 3.6774971    | -6.1947518 |
| Cu | 2.5436904    | -2.9349165   | -6.195325  |

## Methoxy\_on\_Cu.xyz

93

Atoms

|    |              |              |              |
|----|--------------|--------------|--------------|
| H  | 0.38471084   | 0.22228902   | 3.087579     |
| H  | 1.2844463    | 1.7810314    | 3.0833007    |
| H  | 2.1844433    | 0.22181979   | 3.0751948    |
| C  | 1.2819691    | 0.74222735   | 2.7090163    |
| O  | 1.2735041    | 0.74245431   | 1.2745381    |
| Cu | -0.094672184 | 1.5111831    | 0.00571133   |
| Cu | 2.6418691    | 1.5105105    | 0.003997042  |
| Cu | 1.2733572    | -0.8419113   | 0.001429628  |
| Cu | 1.2725184    | -5.1427744   | -0.034323241 |
| Cu | 6.3612872    | 3.6712316    | -0.034323241 |
| Cu | -3.8162503   | 3.6712316    | -0.034323241 |
| Cu | 0.005690466  | 5.8696167    | -0.036878197 |
| Cu | -5.0830783   | -2.9443893   | -0.036878197 |
| Cu | 5.0944592    | -2.9443893   | -0.036878197 |
| Cu | 5.1188086    | 1.4657042    | -0.037968243 |
| Cu | -5.0587289   | 1.4657042    | -0.037968243 |
| Cu | -2.549992    | -2.9444651   | -0.038700163 |
| Cu | 2.5387767    | 5.8695409    | -0.038700163 |
| Cu | 6.3612118    | -0.7369192   | -0.039973081 |
| Cu | -3.8163257   | -0.7369192   | -0.039973081 |
| Cu | 3.8394014    | 3.6883173    | -0.040516641 |
| Cu | -1.2493673   | -5.1256887   | -0.040516641 |
| Cu | -1.2922889   | 3.6888078    | -0.040603688 |
| Cu | 3.7964798    | -5.1251982   | -0.040603688 |
| Cu | -2.5715966   | 1.4654159    | -0.040999075 |
| Cu | 7.6059409    | 1.4654159    | -0.040999075 |
| Cu | -2.5211106   | 5.8457187    | -0.045899106 |
| Cu | 2.5676581    | -2.9682873   | -0.045899106 |
| Cu | -0.021282444 | -2.9674448   | -0.047791518 |
| Cu | 5.0674863    | 5.8465612    | -0.047791518 |
| Cu | -6.3226603   | -0.76506291  | -0.059020767 |
| Cu | 3.8548772    | -0.76506291  | -0.059020767 |
| Cu | -1.3068434   | -0.76397727  | -0.061453636 |
| Cu | 1.274278     | 3.7048838    | -0.07812484  |
| Cu | -3.8144907   | -5.1091222   | -0.07812484  |
| Cu | 2.5361323    | -0.006983571 | -2.0694323   |
| Cu | -1.2587491   | 2.1870422    | -2.070132    |
| Cu | 0.008839396  | -0.007174904 | -2.0710709   |
| Cu | 1.2723531    | -2.200807    | -2.0714465   |
| Cu | 3.8060054    | 2.1876754    | -2.0715609   |
| Cu | 1.2736641    | 2.1762968    | -2.0741417   |
| Cu | -3.8163463   | -2.2090365   | -2.0945161   |
| Cu | 1.2724224    | 6.6049695    | -2.0945161   |
| Cu | 6.3611912    | -2.2090365   | -2.0945161   |
| Cu | -5.0907356   | -0.000999929 | -2.0948923   |
| Cu | 5.0868019    | -0.000999929 | -2.0948923   |
| Cu | 7.6352494    | -0.001564023 | -2.0956185   |

|    |              |              |            |
|----|--------------|--------------|------------|
| Cu | -2.5422881   | -0.001564023 | -2.0956185 |
| Cu | 5.091656     | 4.4044743    | -2.0981096 |
| Cu | 0.002887266  | -4.4095317   | -2.0981096 |
| Cu | 2.5427173    | -4.4105671   | -2.0984961 |
| Cu | -2.5460514   | 4.4034389    | -2.0984961 |
| Cu | -3.816423    | 2.206966     | -2.1009038 |
| Cu | 6.3611145    | 2.206966     | -2.1009038 |
| Cu | -1.2716877   | 6.6022096    | -2.1025863 |
| Cu | 3.817081     | -2.2117964   | -2.1025863 |
| Cu | 3.8162991    | 6.6021684    | -2.1035185 |
| Cu | -1.2724696   | -2.2118376   | -2.1035185 |
| Cu | -2.5391238   | -4.4242263   | -2.1117308 |
| Cu | 2.5496449    | 4.3897797    | -2.1117308 |
| Cu | -0.003748858 | 4.3895834    | -2.1119997 |
| Cu | 5.0850199    | -4.4244226   | -2.1119997 |
| Cu | -2.525819    | 2.9401463    | -4.1173247 |
| Cu | 5.0708907    | 2.9408271    | -4.1188788 |
| Cu | -1.2668057   | 0.73945516   | -4.1243777 |
| Cu | 3.8115624    | 0.73905539   | -4.1245367 |
| Cu | -3.8178407   | 0.74670983   | -4.1261657 |
| Cu | 6.3596968    | 0.74670983   | -4.1261657 |
| Cu | 1.2736359    | -3.6534699   | -4.1281144 |
| Cu | 1.2735959    | 0.73908184   | -4.1281594 |
| Cu | -2.5428619   | -1.4600522   | -4.130743  |
| Cu | 5.0862923    | -1.4592716   | -4.1308151 |
| Cu | 0.006136067  | 2.9415984    | -4.131515  |
| Cu | 2.5466919    | -1.4597183   | -4.1315382 |
| Cu | -0.000982286 | -1.4606602   | -4.1326164 |
| Cu | 2.5392537    | 2.9423026    | -4.1326311 |
| Cu | 1.2717612    | 5.1496956    | -4.1327753 |
| Cu | -1.2699004   | -3.6658874   | -4.137061  |
| Cu | 3.8188683    | 5.1481186    | -4.137061  |
| Cu | -1.2745922   | 5.1492214    | -4.1371287 |
| Cu | 3.8141765    | -3.6647846   | -4.1371287 |
| Cu | -2.5389956   | 1.4750472    | -6.1745095 |
| Cu | 5.0829598    | 1.4750476    | -6.1755077 |
| Cu | 1.272769     | -0.72935909  | -6.1835982 |
| Cu | 0.002007465  | 1.4741776    | -6.1837886 |
| Cu | 2.5431707    | 1.4736472    | -6.1861247 |
| Cu | -1.2741877   | -0.72514966  | -6.188037  |
| Cu | 1.2718479    | 3.6839421    | -6.1883083 |
| Cu | 3.8158975    | 3.6763049    | -6.1887245 |
| Cu | -1.2713868   | 3.6767298    | -6.1888619 |
| Cu | 3.8182702    | -0.72514947  | -6.1903481 |
| Cu | 0.002173078  | -2.92886     | -6.196003  |
| Cu | 2.5423459    | -2.9286779   | -6.1974053 |

## OH\_on\_Cu.xyz

90

Atoms

|    |              |              |              |
|----|--------------|--------------|--------------|
| H  | 1.2838623    | 0.75018588   | 2.2485371    |
| O  | 1.2763271    | 0.74585161   | 1.2682127    |
| Cu | -0.10271879  | 1.5171486    | 0.012081334  |
| Cu | 1.2736849    | -0.84787446  | 0.010844196  |
| Cu | 2.6523081    | 1.5200322    | 0.010373088  |
| Cu | 0.010548766  | 5.870527     | -0.038002168 |
| Cu | -5.07822     | -2.943479    | -0.038002168 |
| Cu | 5.0993175    | -2.943479    | -0.038002168 |
| Cu | 2.5344004    | 5.8686037    | -0.038061463 |
| Cu | -2.5543683   | -2.9454023   | -0.038061463 |
| Cu | 1.273883     | -5.1397921   | -0.038351665 |
| Cu | 6.3626518    | 3.6742139    | -0.038351665 |
| Cu | -3.8148857   | 3.6742139    | -0.038351665 |
| Cu | 6.3610344    | -0.73921572  | -0.038837577 |
| Cu | -3.8165031   | -0.73921572  | -0.038837577 |
| Cu | -2.5731629   | 1.4693206    | -0.043883536 |
| Cu | 7.6043746    | 1.4693206    | -0.043883536 |
| Cu | 5.1200305    | 1.4703787    | -0.044849099 |
| Cu | -5.057507    | 1.4703787    | -0.044849099 |
| Cu | -1.2960168   | 3.6897678    | -0.046345535 |
| Cu | 3.7927519    | -5.1242382   | -0.046345535 |
| Cu | -0.024671077 | -2.9667751   | -0.046456672 |
| Cu | 5.0640977    | 5.8472309    | -0.046456672 |
| Cu | 3.8413989    | 3.6923843    | -0.04658767  |
| Cu | -1.2473698   | -5.1216217   | -0.04658767  |
| Cu | -2.5208205   | 5.849383     | -0.047404966 |
| Cu | 2.5679482    | -2.964623    | -0.047404966 |
| Cu | -6.3241508   | -0.76247596  | -0.066736252 |
| Cu | 3.8533867    | -0.76247596  | -0.066736252 |
| Cu | -1.3122163   | -0.76646948  | -0.067103258 |
| Cu | 1.2713794    | 3.7056417    | -0.086674796 |
| Cu | -3.8173893   | -5.1083643   | -0.086674796 |
| Cu | 2.5341854    | -0.002385281 | -2.0698608   |
| Cu | 1.2723651    | -2.1970838   | -2.0702473   |
| Cu | 0.010970814  | -0.00299906  | -2.0716863   |
| Cu | 3.8041085    | 2.1885845    | -2.0720309   |
| Cu | -1.2585888   | 2.1872143    | -2.072845    |
| Cu | 1.2718617    | 2.1790763    | -2.0770067   |
| Cu | -3.8167028   | -2.2115289   | -2.0932596   |
| Cu | 6.3608347    | -2.2115289   | -2.0932596   |
| Cu | 1.2720659    | 6.6024771    | -2.0932596   |
| Cu | -5.0900646   | -0.001272708 | -2.0975115   |
| Cu | 5.0874729    | -0.001272708 | -2.0975115   |
| Cu | 7.6346541    | -0.002110107 | -2.098356    |
| Cu | -2.5428834   | -0.002110107 | -2.098356    |
| Cu | 0.004017666  | -4.4106244   | -2.1027405   |
| Cu | 5.0927864    | 4.4033816    | -2.1027405   |

|    |              |             |            |
|----|--------------|-------------|------------|
| Cu | 2.5407911    | -4.4116265  | -2.1039707 |
| Cu | -2.5479776   | 4.4023795   | -2.1039707 |
| Cu | -1.273345    | 6.602829    | -2.104433  |
| Cu | 3.8154237    | -2.211177   | -2.104433  |
| Cu | -3.8154683   | 2.2069246   | -2.1056191 |
| Cu | 6.3620692    | 2.2069246   | -2.1056191 |
| Cu | -1.2707627   | -2.2128777  | -2.1060569 |
| Cu | 3.818006     | 6.6011283   | -2.1060569 |
| Cu | -2.5387798   | -4.4228153  | -2.1160859 |
| Cu | 2.5499889    | 4.3911907   | -2.1160859 |
| Cu | -0.005565057 | 4.3910491   | -2.1161162 |
| Cu | 5.0832037    | -4.4229569  | -2.1161162 |
| Cu | 5.0736322    | 2.9393416   | -4.1228193 |
| Cu | -2.5287309   | 2.9387913   | -4.1249712 |
| Cu | 6.3619109    | 0.74428961  | -4.1291847 |
| Cu | -3.8156266   | 0.74428961  | -4.1291847 |
| Cu | 3.811141     | 0.73834471  | -4.1294525 |
| Cu | -1.2665995   | 0.73733021  | -4.1295679 |
| Cu | 5.087573     | -1.4617623  | -4.1297195 |
| Cu | 1.2713557    | -3.6535015  | -4.1306244 |
| Cu | -2.5422582   | -1.4621641  | -4.1314434 |
| Cu | 1.2714999    | 0.73895105  | -4.1357234 |
| Cu | 1.2728014    | 5.1481391   | -4.1360993 |
| Cu | -0.00198405  | -1.4587358  | -4.136296  |
| Cu | 2.5455124    | -1.4588907  | -4.1371986 |
| Cu | -1.2740027   | 5.1486101   | -4.1385443 |
| Cu | 3.814766     | -3.6653959  | -4.1385443 |
| Cu | 2.5395887    | 2.941259    | -4.1387349 |
| Cu | 3.8187189    | 5.1479766   | -4.1401938 |
| Cu | -1.2700498   | -3.6660294  | -4.1401938 |
| Cu | 0.004481723  | 2.9413631   | -4.1403342 |
| Cu | 5.0858529    | 1.4735592   | -6.1792149 |
| Cu | -2.5401267   | 1.4727295   | -6.1792852 |
| Cu | 2.5440405    | 1.471173    | -6.1919185 |
| Cu | 1.2714265    | -0.73466091 | -6.1921998 |
| Cu | 3.8185803    | 3.6757972   | -6.192521  |
| Cu | 1.2722303    | 3.6803794   | -6.192869  |
| Cu | 3.8196067    | -0.7282982  | -6.1937584 |
| Cu | -1.2740218   | 3.675718    | -6.1943707 |
| Cu | -0.000792618 | 1.4707125   | -6.1947788 |
| Cu | -1.2743504   | -0.72837303 | -6.195601  |
| Cu | 2.5418838    | -2.9346947  | -6.1973732 |
| Cu | 0.002364551  | -2.9338517  | -6.1982995 |

# Oxide\_on\_Cu.xyz

103

Atoms

|    |              |              |              |
|----|--------------|--------------|--------------|
| Cu | -5.090931734 | -2.912665996 | -0.010579000 |
| Cu | -3.830532734 | -5.117905996 | 0.022691000  |
| Cu | -2.516032734 | -2.904592996 | 0.064104000  |
| Cu | -2.574180734 | -4.362678996 | -2.033358000 |
| Cu | -1.281305734 | -3.636114996 | -4.035563000 |
| Cu | -1.334487734 | -5.112595996 | -0.047264000 |
| Cu | -0.007885734 | -4.376468996 | -2.023859000 |
| Cu | -3.994388734 | -1.056495996 | 2.336269000  |
| Cu | -6.375607469 | -0.677008000 | 0.067023000  |
| Cu | -5.115734469 | 1.472192000  | 0.061024000  |
| Cu | -5.102481469 | 0.030223000  | -2.021791000 |
| Cu | -3.820101469 | -2.171563000 | -2.023801000 |
| Cu | -3.796267469 | -0.655085000 | -0.046194000 |
| Cu | -3.823489469 | 0.768413000  | -4.041797000 |
| Cu | -3.828905469 | 2.226283000  | -2.013725000 |
| Cu | -2.544196469 | -1.438006000 | -4.035656000 |
| Cu | -2.526359469 | 0.042715000  | -2.033625000 |
| Cu | -1.276979469 | -2.174267000 | -1.992536000 |
| O  | -3.170787469 | 0.370328000  | 3.046655000  |
| Cu | -3.728050469 | 1.927089000  | 2.280080000  |
| Cu | -0.007249266 | -2.907613996 | -6.094804000 |
| Cu | -0.024780266 | -2.885310996 | 0.068815000  |
| Cu | 1.262541734  | -3.646699996 | -4.050422000 |
| Cu | 1.268477734  | -5.109520996 | -0.010567000 |
| Cu | 2.536399734  | -2.904240996 | -6.095119000 |
| Cu | 2.544930734  | -2.916661996 | 0.021593000  |
| Cu | 2.542786734  | -4.387113996 | -2.014328000 |
| Cu | 3.801797734  | -3.647821996 | -4.042300000 |
| Cu | 3.811606734  | -5.113134996 | 0.049242000  |
| Cu | 5.086605734  | -2.912665996 | -0.010579000 |
| Cu | 5.073048734  | -4.375796996 | -2.013949000 |
| O  | 1.915900734  | -1.837049996 | 3.043189000  |
| Cu | 1.362734734  | -3.394426996 | 2.273185000  |
| Cu | 3.542142734  | -2.136683996 | 2.276711000  |
| Cu | -3.820291000 | 3.704485000  | -0.010567000 |
| Cu | -2.544199000 | 1.504446000  | 0.022923000  |
| Cu | -2.551936000 | 1.498646000  | -6.095365000 |
| Cu | -2.543838000 | 5.897344000  | 0.021593000  |
| Cu | -2.540427000 | 2.965111000  | -4.042648000 |
| Cu | -2.545982000 | 4.426892000  | -2.014328000 |
| Cu | -1.289447000 | -0.739491000 | 0.062109000  |
| Cu | -1.286971000 | 5.166184000  | -4.042300000 |
| Cu | -1.272762000 | 0.765306000  | -4.049566000 |
| Cu | -1.277421000 | -0.702611000 | -6.094006000 |
| Cu | -1.277162000 | 3.700871000  | 0.049242000  |
| Cu | -1.271100000 | 2.241434000  | -2.013159000 |
| Cu | -1.278644000 | 3.704520000  | -6.114894000 |

|    |              |              |              |
|----|--------------|--------------|--------------|
| Cu | -0.009376000 | -1.443770000 | -4.036922000 |
| Cu | -0.008812000 | 1.495645000  | -0.008145000 |
| Cu | -0.004351000 | 1.504303000  | -6.083802000 |
| Cu | -0.002163000 | 5.901340000  | -0.010579000 |
| Cu | -0.007957000 | 2.979804000  | -4.042489000 |
| Cu | -0.005356000 | 0.027259000  | -2.025557000 |
| Cu | -0.015720000 | 4.438209000  | -2.013949000 |
| Cu | 1.264182000  | -0.706285000 | -6.078233000 |
| Cu | 1.298259000  | -0.756154000 | -0.053964000 |
| Cu | 1.263505000  | 5.178232000  | -4.049135000 |
| Cu | 1.267736000  | 3.704656000  | -6.095074000 |
| Cu | 1.271422000  | 0.769531000  | -4.045372000 |
| Cu | 1.258236000  | 3.696100000  | 0.022691000  |
| Cu | 1.265534000  | -2.202734000 | -2.035365000 |
| Cu | 1.275800000  | 2.229977000  | -2.014150000 |
| Cu | 2.541301000  | 1.506048000  | -6.099090000 |
| Cu | 2.572736000  | 5.909413000  | 0.064104000  |
| Cu | 2.541165000  | -1.438544000 | -4.042489000 |
| Cu | 2.514588000  | 4.451327000  | -2.033358000 |
| Cu | 2.535838000  | 2.967512000  | -4.042266000 |
| Cu | 2.573190000  | 1.490122000  | 0.060294000  |
| Cu | 2.543851000  | 0.036829000  | -2.023566000 |
| Cu | 3.807463000  | 5.177891000  | -4.035563000 |
| Cu | 3.804064000  | -0.701937000 | -6.099152000 |
| Cu | 3.807541000  | 3.707436000  | -6.077617000 |
| Cu | 3.754281000  | 3.701410000  | -0.047264000 |
| Cu | 3.810603000  | 0.765983000  | -4.046139000 |
| Cu | 3.801930000  | -0.677008000 | 0.067023000  |
| Cu | 3.814872000  | 2.227935000  | -2.023202000 |
| Cu | 3.808360000  | -2.163677000 | -2.013172000 |
| Cu | 5.084751000  | 1.495566000  | -6.098965000 |
| Cu | 5.061803000  | 1.472192000  | 0.061024000  |
| Cu | 5.080883000  | 4.437537000  | -2.023859000 |
| Cu | 5.083445000  | 2.962374000  | -4.044779000 |
| Cu | 5.075056000  | 0.030223000  | -2.021791000 |
| Cu | 5.076146000  | -1.434555000 | -4.043806000 |
| Cu | 6.357436000  | -2.171563000 | -2.023801000 |
| Cu | 6.381270000  | -0.655085000 | -0.046194000 |
| Cu | 6.354048000  | 0.768413000  | -4.041797000 |
| Cu | 6.348632000  | 2.226283000  | -2.013725000 |
| Cu | 7.651178000  | 0.042715000  | -2.033625000 |
| O  | 0.195339000  | 1.145040000  | 1.984120000  |
| O  | 5.990127000  | 3.672657000  | 1.986157000  |
| O  | 2.548821000  | 3.672945000  | 3.046346000  |
| Cu | -1.547868000 | 0.672202000  | 2.272541000  |
| Cu | 1.092870000  | -0.409336000 | 2.331869000  |
| Cu | 1.474969000  | 2.418702000  | 2.274608000  |
| Cu | 1.480372000  | 4.934491000  | 2.277606000  |
| Cu | 4.196187000  | 3.670423000  | 2.335556000  |
| Cu | 6.449487000  | 1.927089000  | 2.280080000  |



|    |              |             |              |
|----|--------------|-------------|--------------|
| Cu | -1.280408734 | 6.650328996 | -2.013172000 |
| Cu | 1.268667266  | 6.642442996 | -2.023801000 |
| Cu | 3.811789266  | 6.639738996 | -1.992536000 |
| Cu | 5.063988469  | 5.928695000 | 0.068815000  |
| Cu | 6.357246469  | 3.704485000 | -0.010567000 |
| Cu | 7.633338469  | 1.504446000 | 0.022923000  |

## Oxide\_on\_Cu\_pos2.xyz

103

Atoms

|    |              |              |              |
|----|--------------|--------------|--------------|
| Cu | -3.789731469 | -0.720139000 | 0.055869000  |
| Cu | -6.362582469 | -0.728028000 | -0.023513000 |
| Cu | -5.101737469 | -2.929898000 | 0.008647000  |
| Cu | 6.387806000  | -0.720139000 | 0.055869000  |
| Cu | 5.084763000  | -1.454298000 | -4.063368000 |
| Cu | 3.812356000  | -0.725169000 | -6.096451000 |
| Cu | 3.814955000  | -0.728028000 | -0.023513000 |
| Cu | 1.271619000  | -0.733137000 | 0.009977000  |
| Cu | 1.270465000  | -0.723536000 | -6.108311000 |
| Cu | 5.075800000  | -2.929898000 | 0.008647000  |
| Cu | 2.534706000  | -1.466736000 | -4.055594000 |
| Cu | 3.803423000  | -2.192816000 | -2.027274000 |
| Cu | -1.299063000 | -0.697815000 | 0.049163000  |
| Cu | 3.814163000  | -3.652797000 | -4.055246000 |
| Cu | -0.004214000 | -1.464663000 | -4.062512000 |
| Cu | -1.273137000 | -0.726670000 | -6.106952000 |
| Cu | 2.540260000  | -2.928635000 | 0.036296000  |
| Cu | 1.273320000  | -2.204167000 | -2.026105000 |
| Cu | 2.544161000  | -2.929176000 | -6.127840000 |
| Cu | -2.549023000 | -1.454250000 | -4.049868000 |
| Cu | -0.003696000 | -2.924446000 | -0.021091000 |
| Cu | 0.001571000  | -2.932638000 | -6.096748000 |
| Cu | 3.808423000  | -5.133051000 | -0.023525000 |
| Cu | 1.281195000  | -3.667266000 | -4.055435000 |
| Cu | -1.277084000 | -2.193246000 | -2.038503000 |
| Cu | 2.548093000  | -4.389745000 | -2.026895000 |
| Cu | -2.607347000 | -2.930503000 | -0.066910000 |
| Cu | -1.272647000 | -3.670104000 | -4.058318000 |
| Cu | 1.268430000  | -5.121969000 | 0.009745000  |
| Cu | -3.843760000 | -2.178872000 | -2.048311000 |
| Cu | -0.010052000 | -4.404118000 | -2.027096000 |
| Cu | -1.299481000 | -5.157763000 | 0.047348000  |
| Cu | -2.543400000 | -4.405709000 | -2.036512000 |
| Cu | -3.790640000 | -5.138318000 | 0.054077000  |
| O  | -0.409405000 | -2.925943000 | 1.971174000  |
| Cu | 5.253141000  | -1.667204000 | 2.260239000  |
| Cu | 0.052709000  | -1.179862000 | 2.259595000  |
| Cu | -2.204299000 | -2.926040000 | 2.318923000  |
| Cu | 0.053804000  | -4.670966000 | 2.261662000  |
| Cu | -0.012968734 | 5.884107996  | 0.008647000  |
| Cu | -1.285345734 | 6.621189996  | -2.027274000 |
| Cu | -1.274605734 | 5.161208996  | -4.055246000 |
| Cu | -2.548508734 | 5.885370996  | 0.036296000  |
| Cu | -1.269683734 | 3.684516996  | -6.095108000 |
| Cu | -1.280345734 | 3.680954996  | -0.023525000 |
| Cu | -2.540675734 | 4.424260996  | -2.026895000 |
| Cu | -2.539409734 | 2.946407996  | -4.062081000 |

|    |              |              |              |
|----|--------------|--------------|--------------|
| Cu | -3.820338734 | 3.692036996  | 0.009745000  |
| Cu | -2.543428734 | 1.477844996  | -6.106575000 |
| Cu | -2.560803734 | 1.446989996  | 0.051158000  |
| Cu | -3.794469734 | 2.226390996  | -2.046304000 |
| Cu | -3.811683734 | 0.743445996  | -4.048509000 |
| Cu | -5.063763734 | 1.527743996  | -0.060210000 |
| Cu | -5.089558734 | 0.010808996  | -2.036805000 |
| O  | -1.116968734 | 3.357392996  | 1.974030000  |
| Cu | 0.163906266  | 4.630507996  | 2.263765000  |
| Cu | -0.221126734 | 1.803234996  | 2.323323000  |
| Cu | -2.858928734 | 2.880465996  | 2.264660000  |
| Cu | 6.333777469  | -2.178872000 | -2.048311000 |
| Cu | 5.096189469  | -4.400552000 | -2.026118000 |
| Cu | 5.085072734  | 5.889559996  | -0.021091000 |
| Cu | 3.811684734  | 6.620759996  | -2.038503000 |
| Cu | 2.481421734  | 5.883502996  | -0.066910000 |
| Cu | 3.816121734  | 5.143901996  | -4.058318000 |
| Cu | 6.357198734  | 3.692036996  | 0.009745000  |
| Cu | 1.245008734  | 6.635133996  | -2.048311000 |
| Cu | 5.078716734  | 4.409887996  | -2.027096000 |
| Cu | 3.819025734  | 3.675895996  | -6.112036000 |
| Cu | 7.616733734  | 1.446989996  | 0.051158000  |
| Cu | 1.269001734  | 5.148309996  | -4.055435000 |
| Cu | 6.383067734  | 2.226390996  | -2.046304000 |
| Cu | 5.087421734  | 2.949894996  | -4.055212000 |
| Cu | 3.789287734  | 3.656242996  | 0.047348000  |
| Cu | 2.545368734  | 4.408296996  | -2.036512000 |
| Cu | 6.365853734  | 0.743445996  | -4.048509000 |
| Cu | 1.275471734  | 3.686303996  | -6.112098000 |
| Cu | 5.092363734  | 1.478605996  | -6.090563000 |
| Cu | 5.113773734  | 1.527743996  | -0.060210000 |
| Cu | 2.543458734  | 2.946680996  | -4.059085000 |
| Cu | 1.298128734  | 3.675687996  | 0.054077000  |
| Cu | 3.807411734  | 2.212007996  | -2.036148000 |
| Cu | 0.007420734  | 4.413453996  | -2.026118000 |
| Cu | 2.538222734  | 1.478444996  | -6.111911000 |
| Cu | 2.529453734  | 1.510005996  | 0.048078000  |
| Cu | 5.087978734  | 0.010808996  | -2.036805000 |
| Cu | 3.809168734  | 0.746171996  | -4.057725000 |
| Cu | 1.274045734  | 2.219511996  | -2.034737000 |
| Cu | 0.004965734  | 2.950956996  | -4.056752000 |
| Cu | -1.273947266 | 2.209831996  | -2.036747000 |
| Cu | 0.027444734  | 1.430951996  | -0.059140000 |
| Cu | 1.273840734  | 0.742777996  | -4.054743000 |
| Cu | -0.001793266 | 1.474382996  | -6.090144000 |
| Cu | 2.539101734  | 0.018532996  | -2.026671000 |
| Cu | -1.276620266 | 0.738087996  | -4.048602000 |
| Cu | -0.003197266 | -0.017720004 | -2.046571000 |
| Cu | -2.547849266 | 0.008776996  | -2.005482000 |
| O  | 3.970950734  | -0.394179004 | 1.973211000  |

|    |             |             |              |
|----|-------------|-------------|--------------|
| O  | 5.691852734 | 2.585934996 | 3.033400000  |
| O  | 0.602738734 | 0.376563996 | 3.033709000  |
| Cu | 5.142572734 | 4.143039996 | 2.261662000  |
| Cu | 4.865985734 | 1.160534996 | 2.322610000  |
| Cu | 2.229564734 | 0.080786996 | 2.267134000  |
| Cu | 7.629688203 | 0.008776996 | -2.005482000 |

# Single\_H2O\_on\_Cu.xyz

91

Atoms

|    |              |              |              |
|----|--------------|--------------|--------------|
| H  | 1.0610212    | 0.26642008   | 2.4407989    |
| H  | 2.3083411    | -0.66838736  | 2.4356672    |
| O  | 1.3316533    | -0.67120799  | 2.2936871    |
| Cu | 1.2662171    | -0.74679151  | 0.021331955  |
| Cu | 6.3606638    | -0.73574908  | -0.031033666 |
| Cu | -3.8168737   | -0.73574908  | -0.031033666 |
| Cu | -2.5435087   | 1.4662557    | -0.033873738 |
| Cu | 7.6340288    | 1.4662557    | -0.033873738 |
| Cu | 5.0872939    | 1.4670606    | -0.035135096 |
| Cu | -5.0902436   | 1.4670606    | -0.035135096 |
| Cu | 0.000739466  | 5.8758089    | -0.035318046 |
| Cu | -5.0880293   | -2.9381971   | -0.035318046 |
| Cu | 5.0895082    | -2.9381971   | -0.035318046 |
| Cu | 3.8194409    | 3.6685373    | -0.035561171 |
| Cu | -1.2693278   | -5.1454687   | -0.035561171 |
| Cu | -1.2748576   | 3.6649537    | -0.038817719 |
| Cu | 3.8139111    | -5.1490523   | -0.038817719 |
| Cu | 2.5415836    | 5.8726106    | -0.039611675 |
| Cu | -2.5471851   | -2.9413954   | -0.039611675 |
| Cu | 1.2720068    | 3.6650398    | -0.042908977 |
| Cu | -3.8167619   | -5.1489662   | -0.042908977 |
| Cu | 1.2716961    | -5.1431907   | -0.043182145 |
| Cu | 6.3604649    | 3.6708153    | -0.043182145 |
| Cu | -3.8170726   | 3.6708153    | -0.043182145 |
| Cu | 2.549866     | 1.4787987    | -0.048084402 |
| Cu | -1.2914574   | -0.73800014  | -0.048716792 |
| Cu | -0.011292211 | -2.9603233   | -0.051266754 |
| Cu | 5.0774765    | 5.8536827    | -0.051266754 |
| Cu | -6.3442645   | -0.73788794  | -0.05258344  |
| Cu | 3.833273     | -0.73788794  | -0.05258344  |
| Cu | -2.5303703   | 5.8582719    | -0.053777952 |
| Cu | 2.5583984    | -2.9557341   | -0.053777952 |
| Cu | -0.007935079 | 1.4826629    | -0.054905726 |
| Cu | 0.008117278  | -0.01619761  | -2.0761778   |
| Cu | 1.2719151    | -2.2040382   | -2.0790459   |
| Cu | 2.5370997    | -0.013738838 | -2.0796852   |
| Cu | 6.362042     | 2.1954748    | -2.092505    |
| Cu | -3.8154955   | 2.1954748    | -2.092505    |
| Cu | 1.2718797    | 6.6020839    | -2.0933773   |
| Cu | -3.816889    | -2.2119221   | -2.0933773   |
| Cu | 6.3606485    | -2.2119221   | -2.0933773   |
| Cu | -0.001012034 | -4.4129931   | -2.0969921   |
| Cu | 5.0877567    | 4.4010129    | -2.0969921   |
| Cu | -1.2706152   | -2.2119626   | -2.0972401   |
| Cu | 3.8181535    | 6.6020434    | -2.0972401   |
| Cu | 2.54605      | -4.4150189   | -2.098331    |
| Cu | -2.5427187   | 4.3989871    | -2.098331    |

|    |              |              |            |
|----|--------------|--------------|------------|
| Cu | -2.5477792   | -0.005826796 | -2.0984259 |
| Cu | 7.6297583    | -0.005826796 | -2.0984259 |
| Cu | 3.8178192    | 2.1966463    | -2.0999203 |
| Cu | -1.2730478   | 6.6037924    | -2.1004955 |
| Cu | 3.8157209    | -2.2102136   | -2.1004955 |
| Cu | -5.0855806   | -0.004199886 | -2.1010946 |
| Cu | 5.0919569    | -0.004199886 | -2.1010946 |
| Cu | -2.5457507   | -4.4181318   | -2.1031516 |
| Cu | 2.543018     | 4.3958742    | -2.1031516 |
| Cu | 0.000595314  | 4.3951072    | -2.1033294 |
| Cu | 5.089364     | -4.4188988   | -2.1033294 |
| Cu | 1.2724961    | 2.1906205    | -2.1040655 |
| Cu | -1.275339    | 2.1953617    | -2.1060812 |
| Cu | -1.263289    | 0.73680152   | -4.1300487 |
| Cu | 3.80892      | 0.73975122   | -4.1302321 |
| Cu | 5.0887557    | -1.461599    | -4.1314667 |
| Cu | -2.5421777   | -1.4614691   | -4.132079  |
| Cu | 1.268564     | 0.73883416   | -4.1346804 |
| Cu | 0.000404132  | -1.4595884   | -4.1347392 |
| Cu | 2.5418005    | -1.4607013   | -4.135251  |
| Cu | 1.2710836    | -3.6574281   | -4.1352837 |
| Cu | 5.0898918    | 2.9462013    | -4.135391  |
| Cu | 6.3633607    | 0.74549796   | -4.1354893 |
| Cu | -3.8141768   | 0.74549796   | -4.1354893 |
| Cu | -1.273789    | 5.149557     | -4.136231  |
| Cu | 3.8149797    | -3.664449    | -4.136231  |
| Cu | 1.2733238    | 5.1504262    | -4.1367814 |
| Cu | 2.543349     | 2.9448417    | -4.1378611 |
| Cu | -1.2706047   | -3.6636298   | -4.1379907 |
| Cu | 3.818164     | 5.1503762    | -4.1379907 |
| Cu | -2.5450492   | 2.9459939    | -4.1383116 |
| Cu | 0.000391429  | 2.9438276    | -4.140034  |
| Cu | 5.0879241    | 1.4698343    | -6.1860312 |
| Cu | 3.8170221    | -0.732633    | -6.1883548 |
| Cu | 3.8156713    | 3.6752656    | -6.1902909 |
| Cu | -2.543264    | 1.4704713    | -6.1903604 |
| Cu | -1.2714864   | 3.6742033    | -6.1931713 |
| Cu | 1.2727796    | 3.6741691    | -6.193414  |
| Cu | 2.5441651    | 1.4723176    | -6.1942561 |
| Cu | 2.5451833    | -2.9368089   | -6.1952788 |
| Cu | 1.2721905    | -0.73377216  | -6.195442  |
| Cu | -1.2727521   | -0.73335636  | -6.1956336 |
| Cu | 2.049e-06    | 1.4716956    | -6.1993714 |
| Cu | -0.000520232 | -2.9380491   | -6.1996097 |
