# Supplementary material for: Core electron binding energies of adsorbates on Cu(111) from first-principles calculations
Source: Royal Society of Chemistry journal article supplement (doi:10.1039/c8cp04955f), 2018-01-01
Supplement: c8cp04955f4.pdf [file c8cp04955f4.pdf]

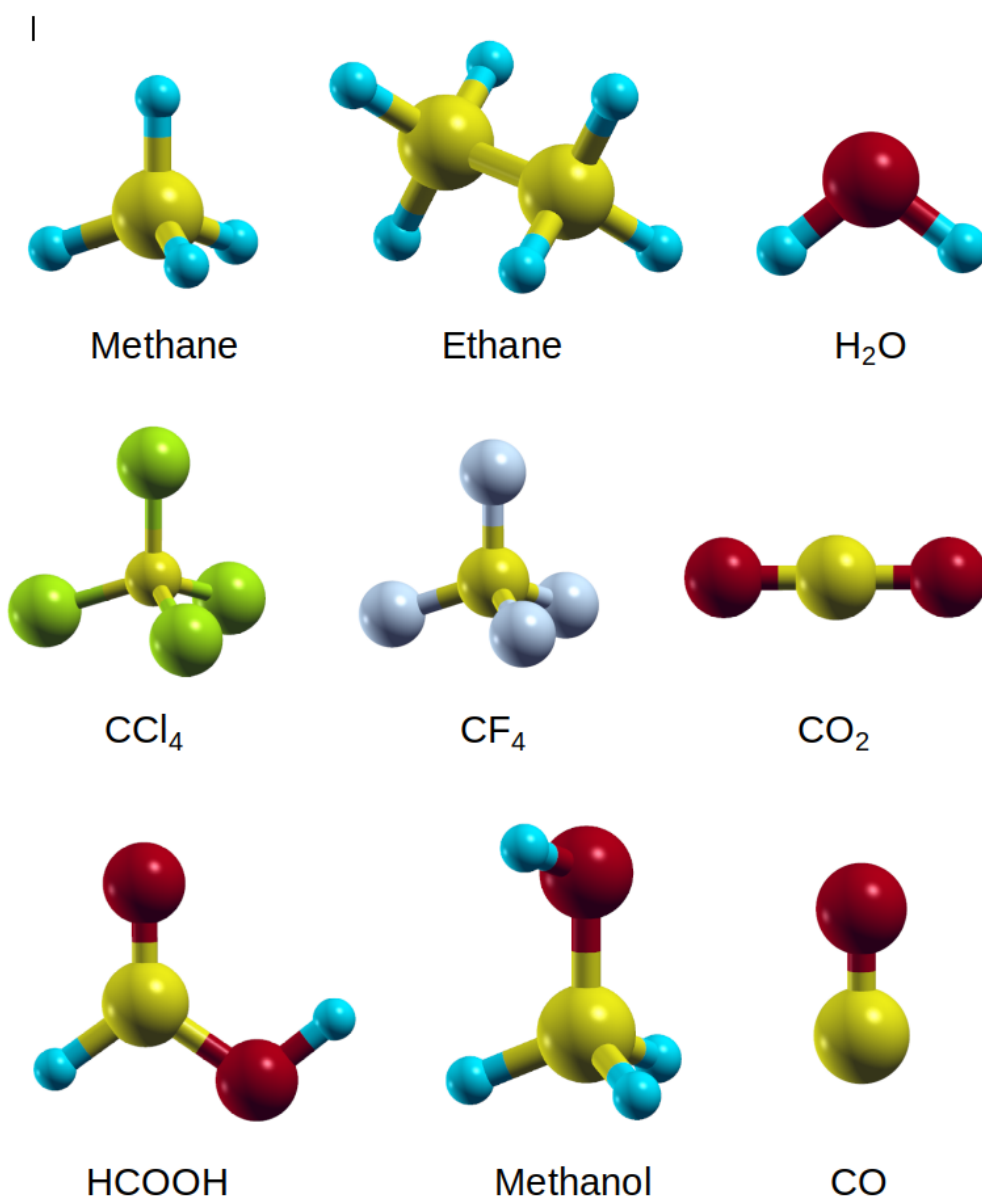

Supplementary Figure 1: The geometries of the molecules used in the calculations of C1s and O1s core level binding energy shifts in gas phase XPS.

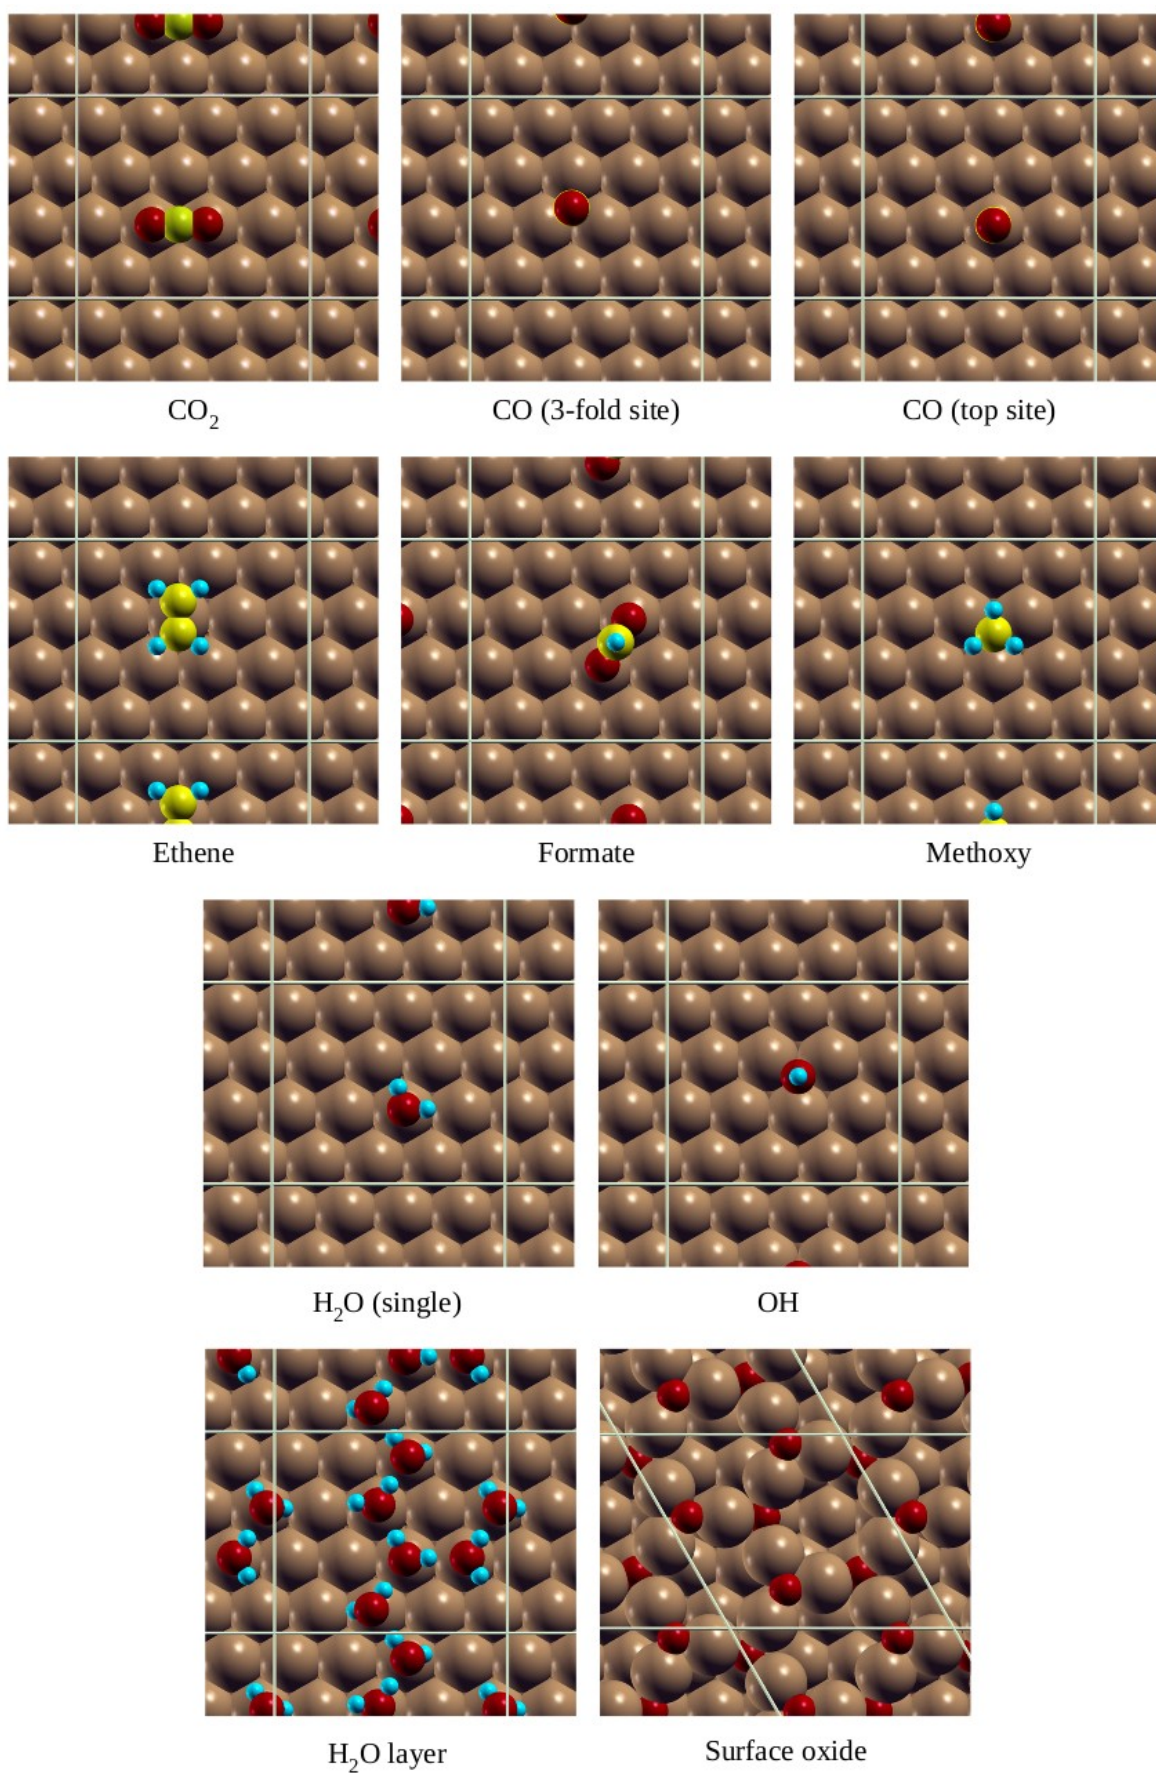

Supplementary Figure 2: The relaxed geometries of the adsorbates on Cu(111) slabs.
